# Supplementary material for: Rice husk biochar modified-CuCo2O4 as an efficient peroxymonosulfate activator for non-radical degradation of organic pollutants from aqueous environment
Source: Royal Society of Chemistry journal article supplement (doi:10.1039/d1ra06914d), 2021-01-01
Supplement: d1ra06914d1.pdf [file d1ra06914d1.pdf]

**Rice husk biochar modified-CuCo<sub>2</sub>O<sub>4</sub> as an efficient  
peroxymonosulfate activator for non-radical degradation of organic  
pollutants from aqueous environment**

Kai Xie<sup>ab</sup>, Ruirui Han<sup>c</sup>, Ping Sun<sup>a</sup>, Hui Wang<sup>a</sup>, Yingsen Fang<sup>\*a</sup>, Zhicai Zhai<sup>a</sup>, Danzhu Ma<sup>b</sup>, Hui Liu<sup>\*a</sup>

<sup>a</sup> College of Biological, Chemical Sciences and Engineering, Jiaying University,

Zhejiang Jiaying 314001, PR China

<sup>b</sup> College of Petroleum Engineering, Liaoning Petrochemical University,

Liaoning Fushun 113001, PR China

<sup>c</sup> College of of Advanced Materials and Engineering, Jiaying Nanhu University,

Zhejiang Jiaying 314001, PR China

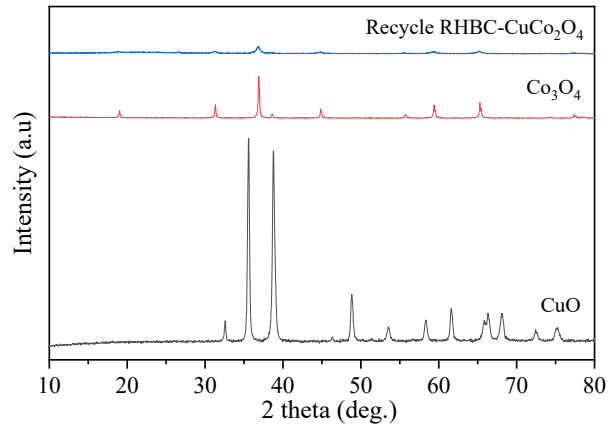

Fig. S1. XRD patterns of CuO, Co<sub>2</sub>O<sub>3</sub>, and recycle RHBC-CuCo<sub>2</sub>O<sub>4</sub>.

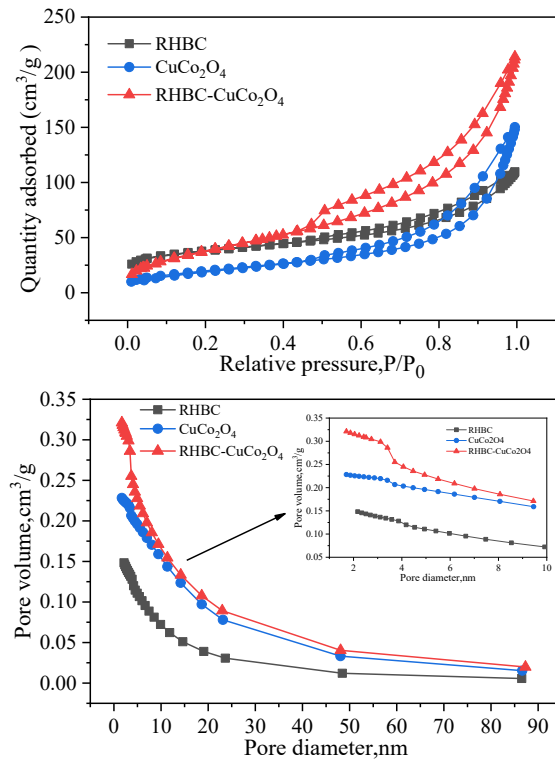

Fig. S2.  $N_2$  sorption isotherms and pore size distributions of different materials (RHBC,  $CuCo_2O_4$ , RHBC- $CuCo_2O_4$ ).

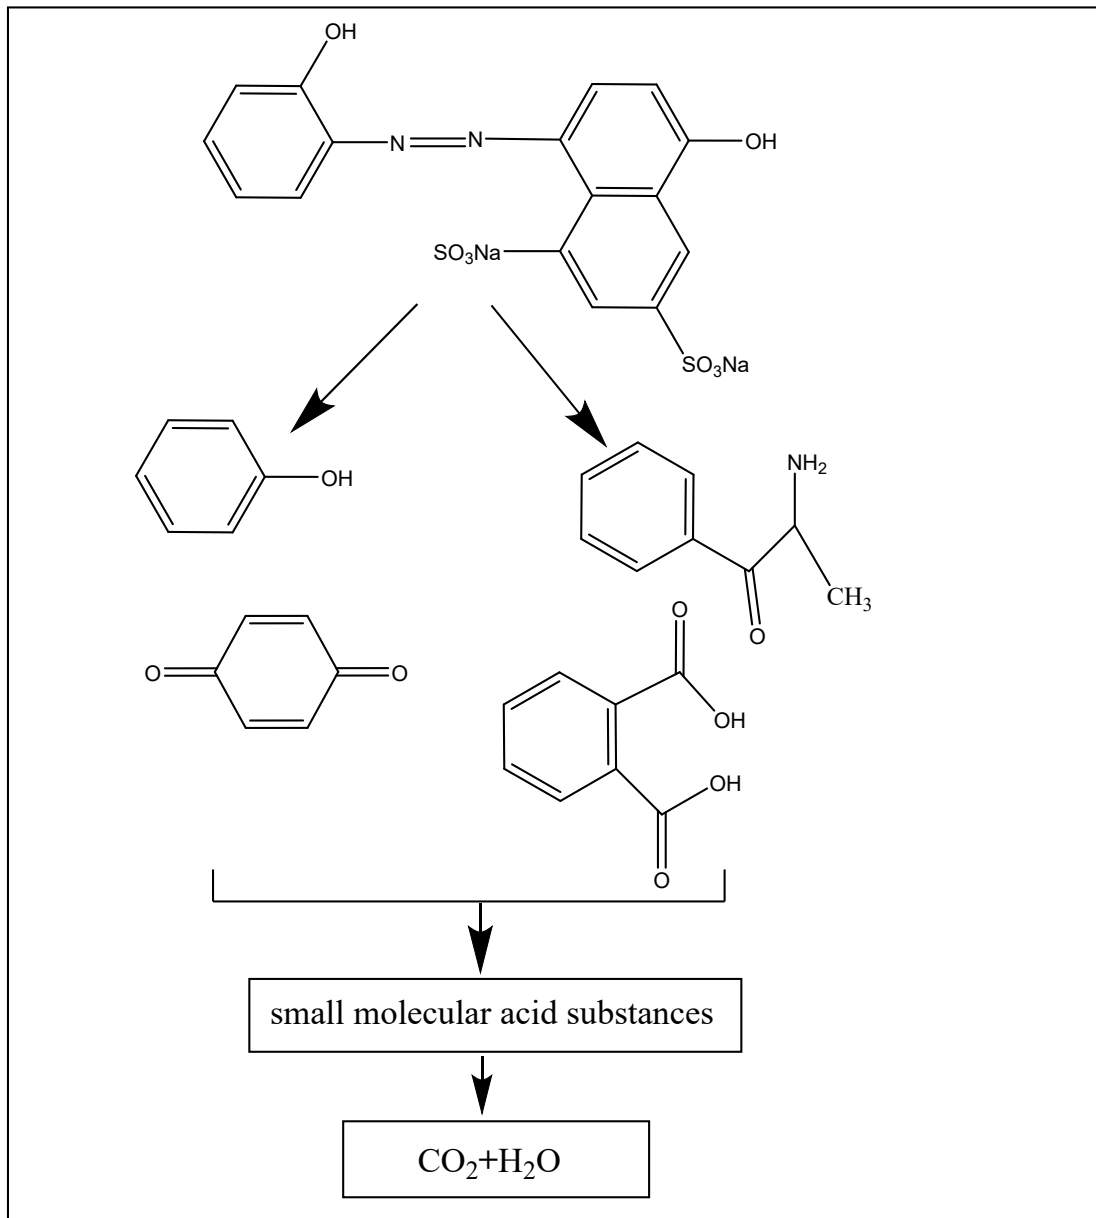

Fig S3. A possible pathway of OG oxidation degradation.

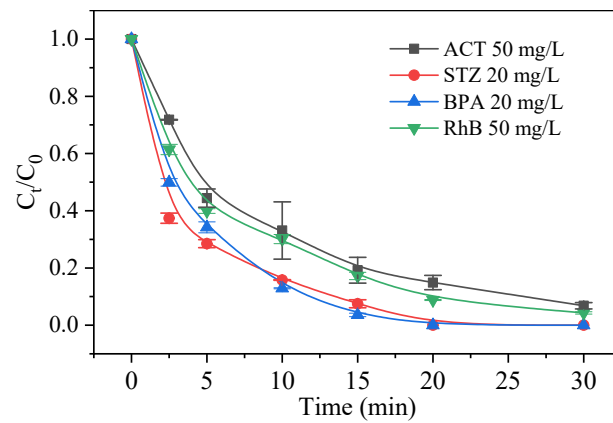

Fig S4. Biodegradation efficiency of RHBC-CuCo<sub>2</sub>O<sub>4</sub> for different pollutant. Condition: [ACT] = 50 mg/L, [STZ] = 20 mg/L, [BPA] = 20 mg/L, [RhB] = 50 mg/L, [catalyst] = 100 mg/L, [PMS] = 307 mg/L, and T = 25 °C.

Table S1. Surface porosity of various materials.

| Catalysts                              | SSA(m <sup>2</sup> /g) | Pore size (nm) | Pore volume (cm <sup>3</sup> /g) |
|----------------------------------------|------------------------|----------------|----------------------------------|
| RHBC                                   | 128.6                  | 5.12           | 0.165                            |
| CuCo <sub>2</sub> O <sub>4</sub>       | 72.6                   | 12.01          | 0.218                            |
| RHBC- CuCo <sub>2</sub> O <sub>4</sub> | 142.9                  | 8.81           | 0.315                            |

Table S2. Degradation of pollutants by different catalysts.

| Preparation method   | Catalysts                                          | Pollutant        | Oxidants     | Initial pH | Ros                                                                                             | Ref.       |
|----------------------|----------------------------------------------------|------------------|--------------|------------|-------------------------------------------------------------------------------------------------|------------|
| Sol-gel method       | CuCo <sub>2</sub> O <sub>4</sub> @kaolin (0.1 g/L) | SIZ (10 mg/L)    | PMS (1 mM)   | 7.0        | SO <sub>4</sub> <sup>•-</sup> , •OH, O <sub>2</sub> <sup>•-</sup> , <sup>1</sup> O <sub>2</sub> | [1]        |
| pyrolysis method     | RHBC-CuCo <sub>2</sub> O <sub>4</sub> (0.307 g/L)  | STZ (20 mg/L)    | PMS (1 mM)   | 3.4        | SO <sub>4</sub> <sup>•-</sup> , •OH, O <sub>2</sub> <sup>•-</sup> , <sup>1</sup> O <sub>2</sub> | This study |
| hydro-thermal method | GO-CuCo <sub>2</sub> O <sub>4</sub> (0.05 g/L)     | BPA (22.83 mg/L) | PMS (0.2 mM) | 7.0        | SO <sub>4</sub> <sup>•-</sup> , •OH                                                             | [2]        |
| pyrolysis method     | RHBC-CuCo <sub>2</sub> O <sub>4</sub> (0.1 g/L)    | BPA (20 mg/L)    | PMS (1 mM)   | 3.4        | SO <sub>4</sub> <sup>•-</sup> , •OH, O <sub>2</sub> <sup>•-</sup> , <sup>1</sup> O <sub>2</sub> | This study |
| solvothelmal method  | AC-CuCo <sub>2</sub> O <sub>4</sub> (0.2 g/L)      | 3BF (25.63 mg/L) | PMS (0.4 mM) | 10.0       | SO <sub>4</sub> <sup>•-</sup> , •OH, O <sub>2</sub> <sup>•-</sup> , <sup>1</sup> O <sub>2</sub> | [3]        |
| pyrolysis method     | RHBC-CuCo <sub>2</sub> O <sub>4</sub> (0.1 g/L)    | OG (50 mg/L)     | PMS (1 mM)   | 3.4        | SO <sub>4</sub> <sup>•-</sup> , •OH, O <sub>2</sub> <sup>•-</sup> , <sup>1</sup> O <sub>2</sub> | This study |

## References

1. C. Chen, L. Liu, Y.X. Li, W. Li, L.X. Zhou, Y.Q. Lan, Y. Li, *Chem. Eng. J.*, 2020, **384**, 123257.
2. X. Q. Xu, Y. B. Feng, Z. H. Chen, S. B. Wang, G. H. Wu, T. L. Huang, J. Ma, G. Wen, *Sep. Purif. Technol.*, 2020, **251** 117351.
3. S. Chen, X. Liu, S. Y. Gao, Y.C. Chen, L.J. Rao, Z. W. Wu, *Environ. Res.*, 2020, **183**, 109245.
